# Supplementary material for: Crosslinking of low density polyethylene with octavinyl polyhedral oligomeric silsesquioxane as the crosslinker
Source: Royal Society of Chemistry journal article supplement (doi:10.1039/c4ra04886e), 2014-01-01
Supplement: c4ra04886e1.pdf [file c4ra04886e1.pdf]

## Supporting Information

*for*

### **Crosslinking of low density polyethylene with octavinyl polyhedral oligomeric silsesquioxane as the crosslinker**

Jiachun Wu, Zi Liang Wu,\* Hongmei Yang\* and Qiang Zheng

Key Laboratory of Macromolecular Synthesis and Functionalization of Ministry of Education, Zhejiang University, Hangzhou 310027, China; Department of Polymer Science and Engineering, Zhejiang University, Hangzhou 310027, China.

\*Corresponding author, e-mail:

[wuziliang@zju.edu.cn](mailto:wuziliang@zju.edu.cn) (Z. L. W.), [yanghongmei@zju.edu.cn](mailto:yanghongmei@zju.edu.cn) (H. M. Y.)

**Table S1** Processing conditions of melt blending LDPE/OVPOSS/DCP composite in twin-screw extruder.

| Barrel zone temperature (°C) |     |     |     | Die zone temperature (°C) | Screw speed (rpm) |
|------------------------------|-----|-----|-----|---------------------------|-------------------|
| I                            | II  | III | IV  |                           |                   |
| 110                          | 125 | 135 | 135 | 135                       | 40                |

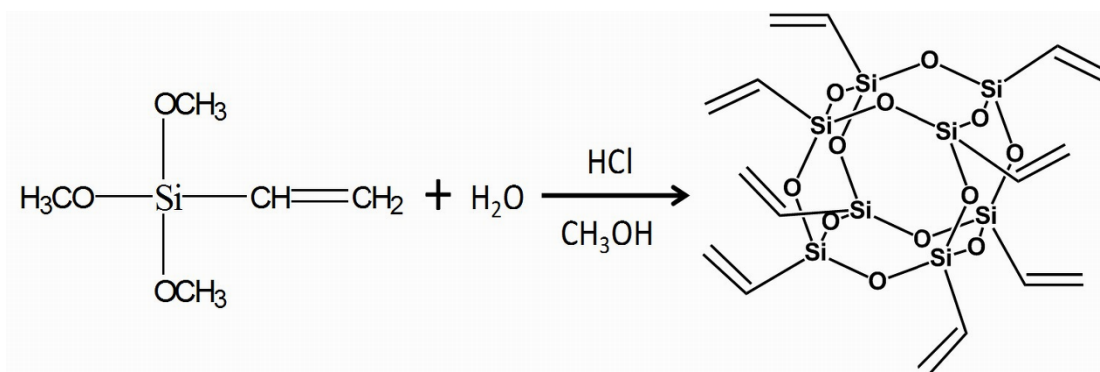

**Figure S1** Synthesis of octavinyl polyhedral oligomeric silsesquioxane (OVPOSS).

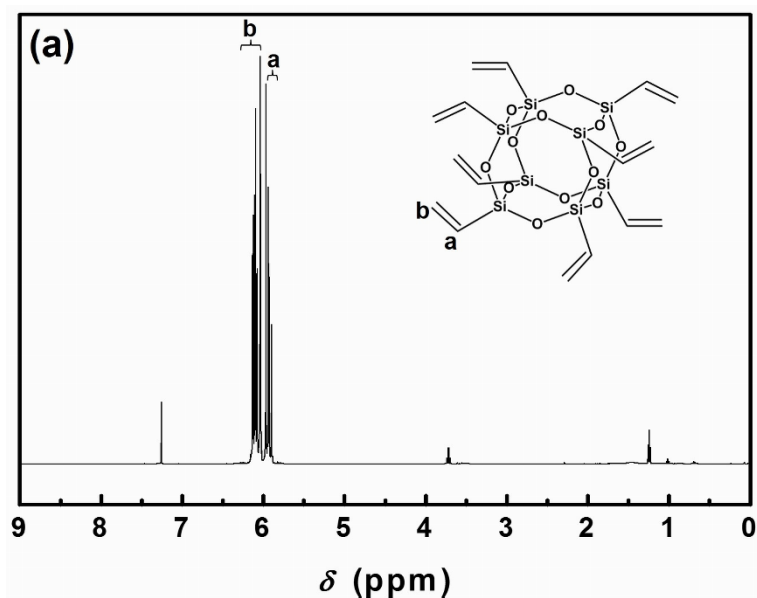

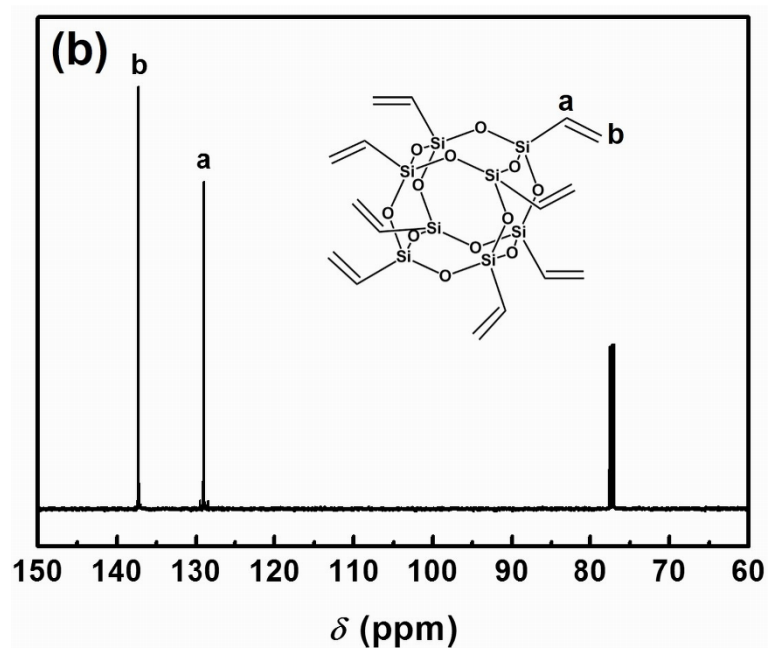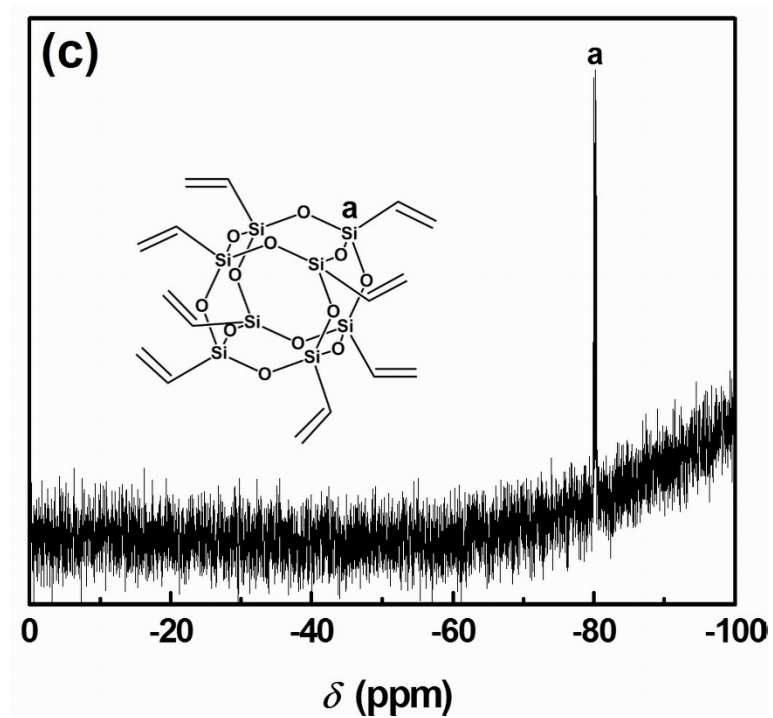

**Figure S2**  $^1\text{H}$ -NMR (a),  $^{13}\text{C}$ -NMR (b), and  $^{29}\text{Si}$ -NMR (c) spectra of synthesized OVPOSS. The solvent is  $\text{CCl}_3\text{D}$ .

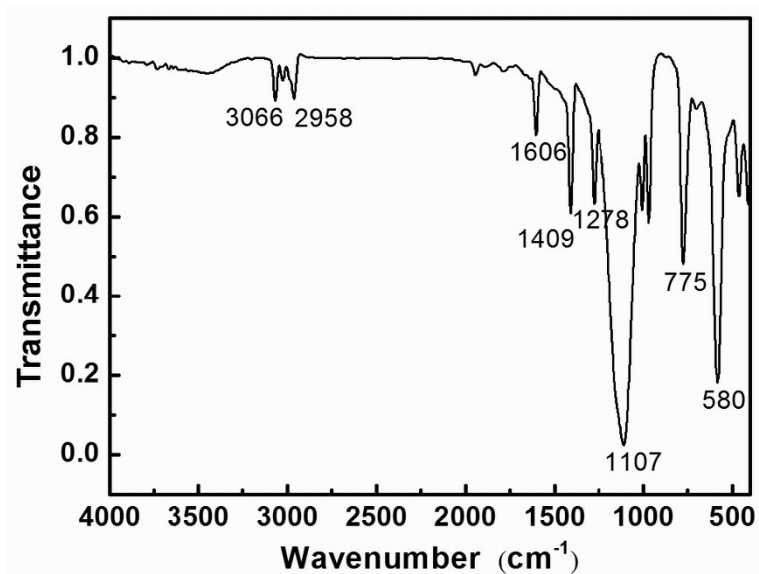

**Figure S3** FTIR spectrum of synthesized OVPOSS.  $\nu_{\text{C-H}(1)} = 3066$ ,  $\nu_{\text{C-H}(2)} = 2958$ ,  $\nu_{\text{C=C}} = 1606$ ,  $\delta_{\text{C-H}(1)} = 1409$ ,  $\delta_{\text{C-H}(2)} = 1278$ ,  $\nu_{\text{Si-O-Si}(1)} = 1107$ ,  $\nu_{\text{Si-O-Si}(2)} = 580$ ,  $\nu_{\text{Si-C=C}} = 775 \text{ cm}^{-1}$ .

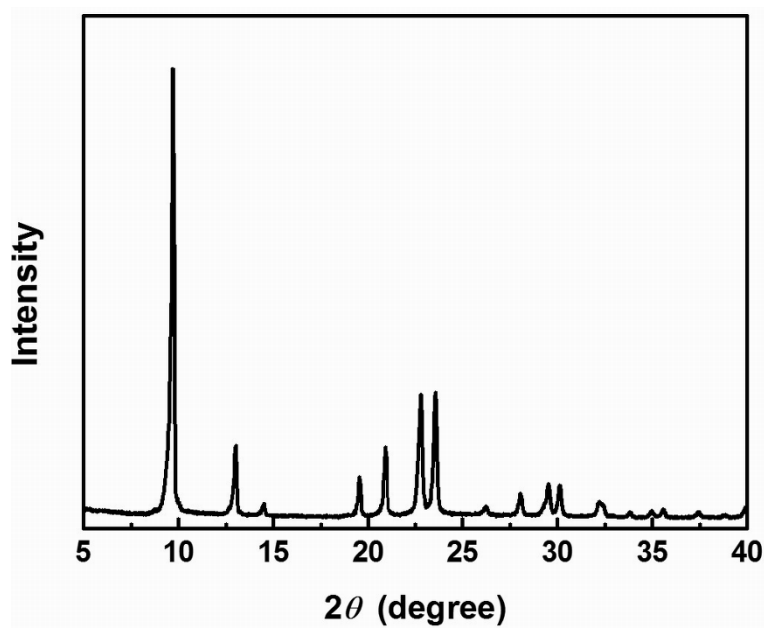

**Figure S4** X-ray diffraction spectrum of synthesized OVPOSS. There are three distinct diffraction peaks at  $2\theta = 9.7^\circ$ ,  $22.8^\circ$ ,  $23.6^\circ$  by OVPOSS, corresponding to d-spacing of 9.1, 3.8, and 3.7 Å, respectively.

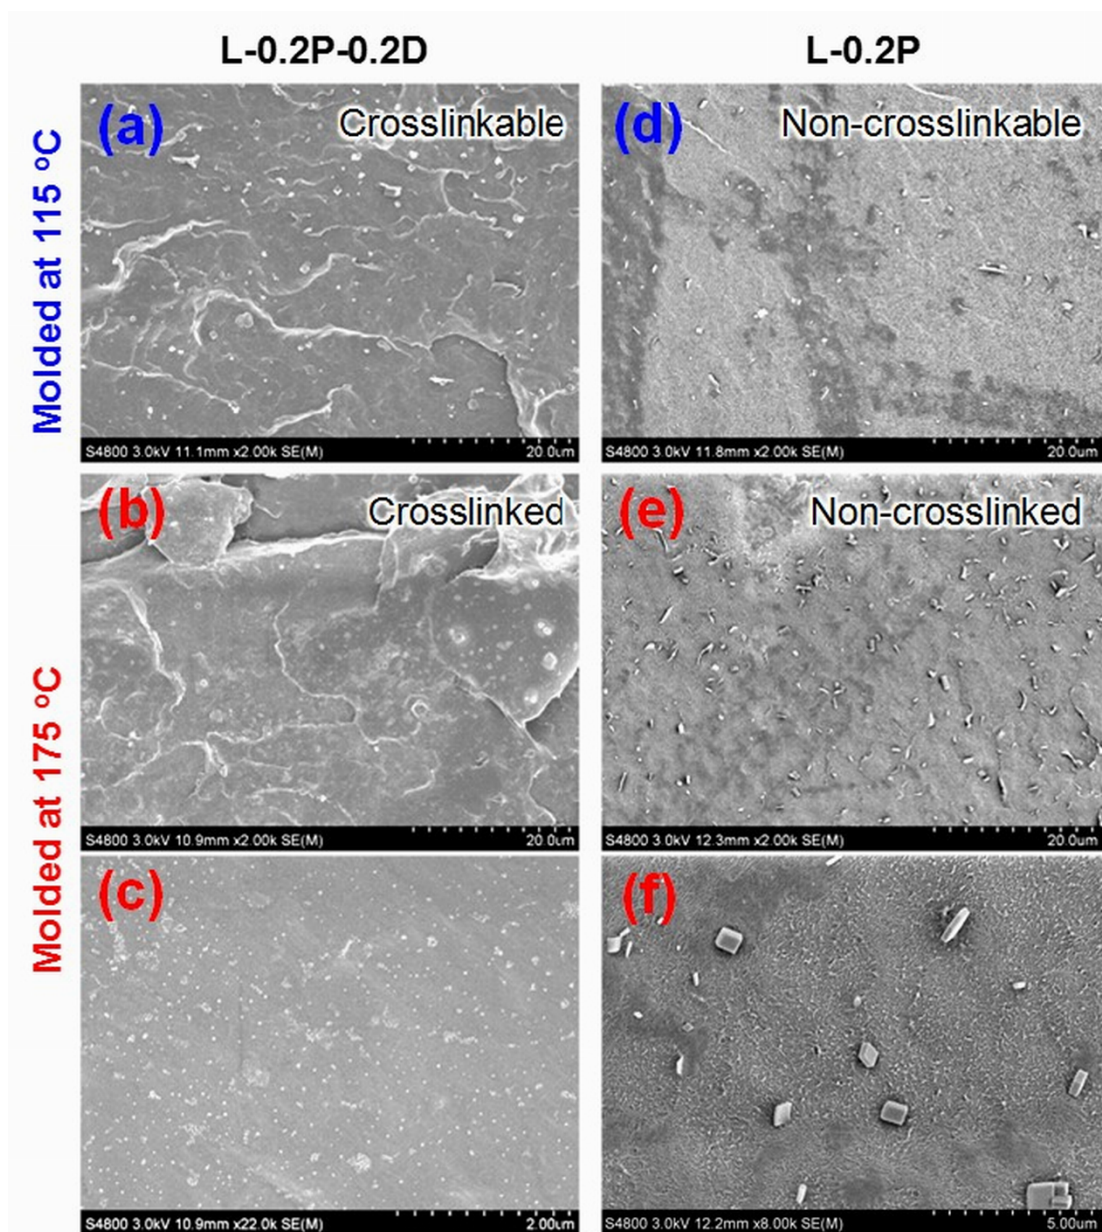

**Figure S5** SEM images of the fracture surface of L-0.2P-0.2D (a, b, c) and L-0.2P (d, e, f) molded at 115 °C (a, d) or at 175 °C (b, c, e, f). For L-0.2P-0.2D, crosslinking reaction took place in the presence of DCP, when the sample was molded at 175 °C. For L-0.2P, no reactions occurred when the sample was molded at 175 °C, due to the absence of DCP as the initiator.

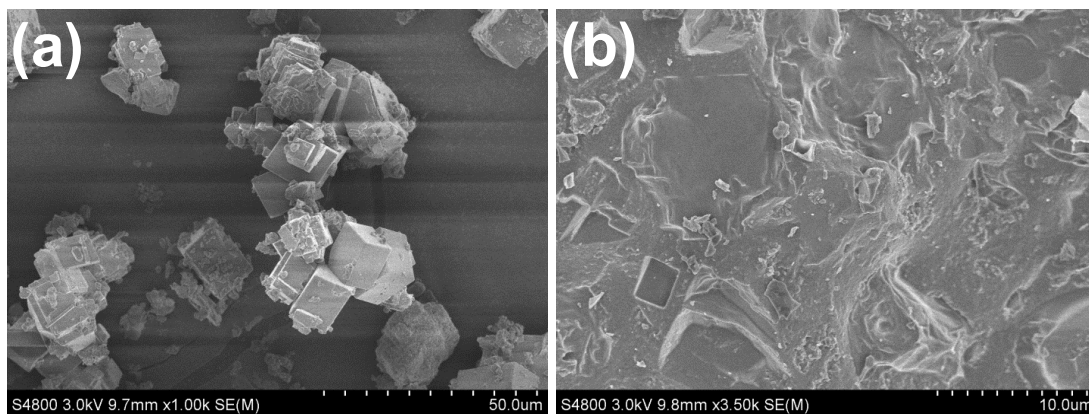

**Figure S6** SEM images of the morphology of the mixture of OVPOSS and DCP before (a) and (b) after the reaction in the aluminum capsules by heating it from 40 to 220 °C in DSC. Mass ratio of OVPOSS and DCP is 10:1; heating rate of DSC is 10 °C/min.

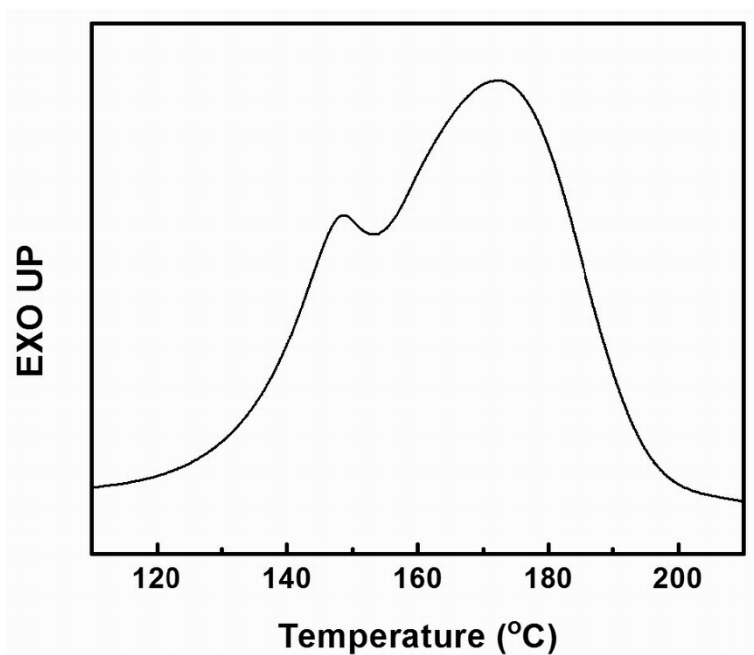

**Figure S7** DSC thermogram of OVPOSS-DCP (25 wt% DCP content) during the first heating process.

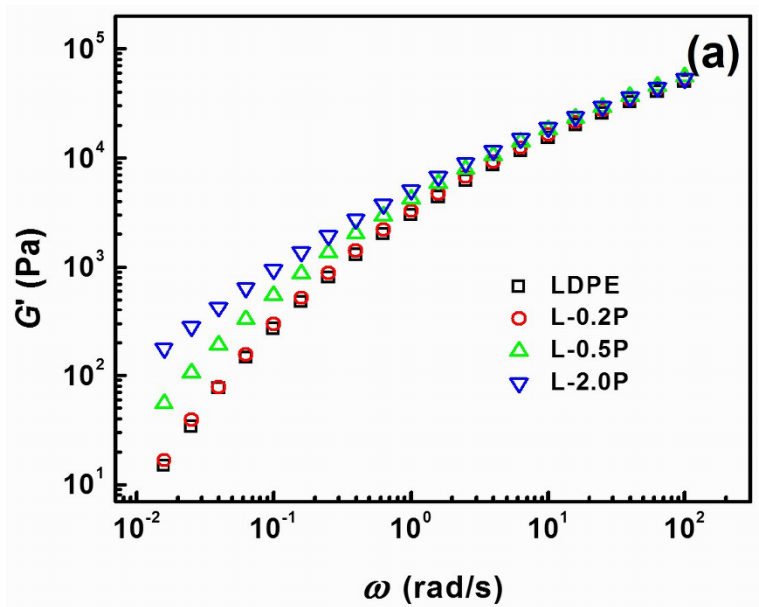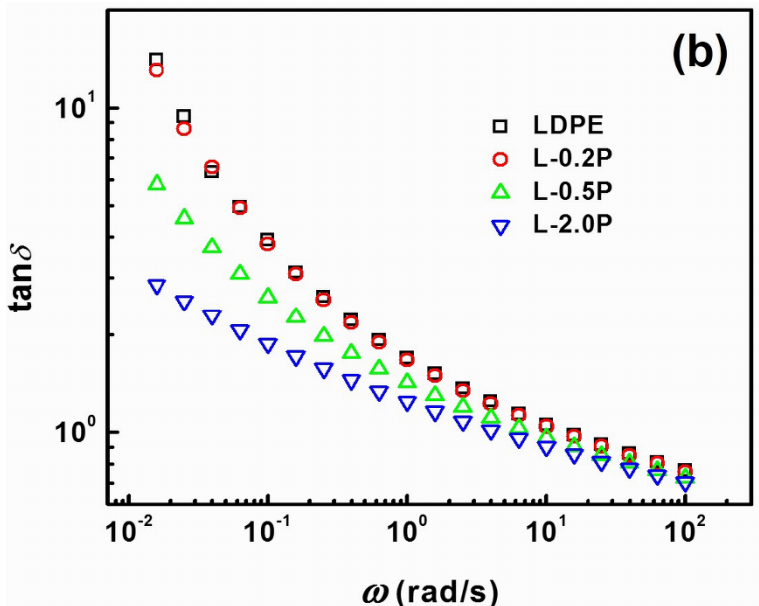

Figure S8  $G'$  (a) and  $\tan\delta$  (b) as a function of  $\omega$  for samples of L-xD at 150 °C.
